# Supplementary material
Source: MDPI journal article supplement (https://www.mdpi.com/2071-1050/15/17/12849)
Supplement: s1 [file s1]

## Supplementary Materials File S1

### Transitional Impact Scale (TIS-12)

Please indicate the extent to which you agree with each of these statements, with regards to the event of disaster (i.e., Southern Alberta flood of 2013) you experienced by selecting a number from 1 (*completely disagree*) to 5 (*completely agree*).

1. The Southern Alberta flood of 2013 has changed the places where I spend time.

*completely disagree 1 2 3 4 5 completely agree*

2. The Southern Alberta flood of 2013 has changed the things I own.

*completely disagree 1 2 3 4 5 completely agree*

3. The Southern Alberta flood of 2013 has changed my material circumstances.

*completely disagree 1 2 3 4 5 completely agree*

4. The Southern Alberta flood of 2013 has changed the activities I engage in.

*completely disagree 1 2 3 4 5 completely agree*

5. The Southern Alberta flood of 2013 has changed the people I spend time with.

*completely disagree 1 2 3 4 5 completely agree*

6. The Southern Alberta flood of 2013 has changed where I live.

*completely disagree 1 2 3 4 5 completely agree*

7. The Southern Alberta flood of 2013 has changed my attitudes.

*completely disagree 1 2 3 4 5 completely agree*

8. The Southern Alberta flood of 2013 has changed the way I think about things.

*completely disagree 1 2 3 4 5 completely agree*

9. The Southern Alberta flood of 2013 has impacted my emotional responses.

*completely disagree 1 2 3 4 5 completely agree*

10. The Southern Alberta flood of 2013 has changed my sense of self.

*completely disagree 1 2 3 4 5 completely agree*

11. The Southern Alberta flood of 2013 has impacted me psychologically.

*completely disagree 1 2 3 4 5 completely agree*

12. The Southern Alberta flood of 2013 has influenced my understanding of right and wrong.

*completely disagree 1 2 3 4 5 completely agree*
